# Supplementary material for: Hierarchical Zeolites Containing Vanadium or Tantalum and Their Application in Cyclohexene Epoxidation Reaction
Source: MDPI journal article supplement (doi:10.3390/ma16155383), 2023-07-31
Supplement: s1 [file s1]

# Hierarchical Zeolites Containing Vanadium or Tantalum and Their Application in Cyclohexene Epoxidation Reaction

Paulina Szczygłewska, Agnieszka Feliczak-Guzik \*, Sylwia Chałupniczak and Izabela Nowak \*

Faculty of Chemistry, Adam Mickiewicz University in Poznań, Uniwersytetu  
Poznańskiego 8, 61-614 Poznań, Poland; paulina.debek@amu.edu.pl (P.S.);  
sylwia.chałupniczak@amu.edu.pl (S.C.)

\* Correspondence: agaguzik@amu.edu.pl (A.F.-G.); nowakiza@amu.edu.pl (I.N.);  
Tel.: +48-61-829-1747 (A.F.-G.); +48-61-829-1580 (I.N.)

## HZ-commercial

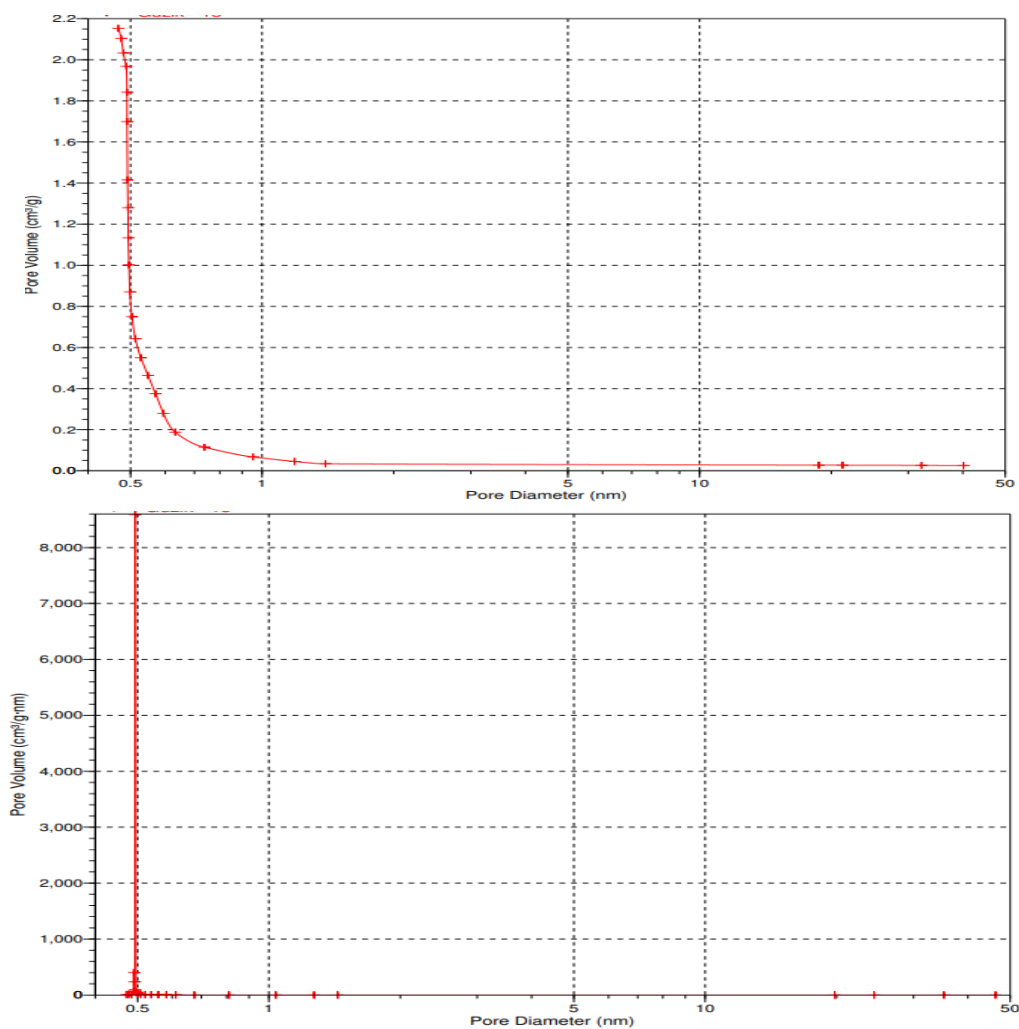

## HZ

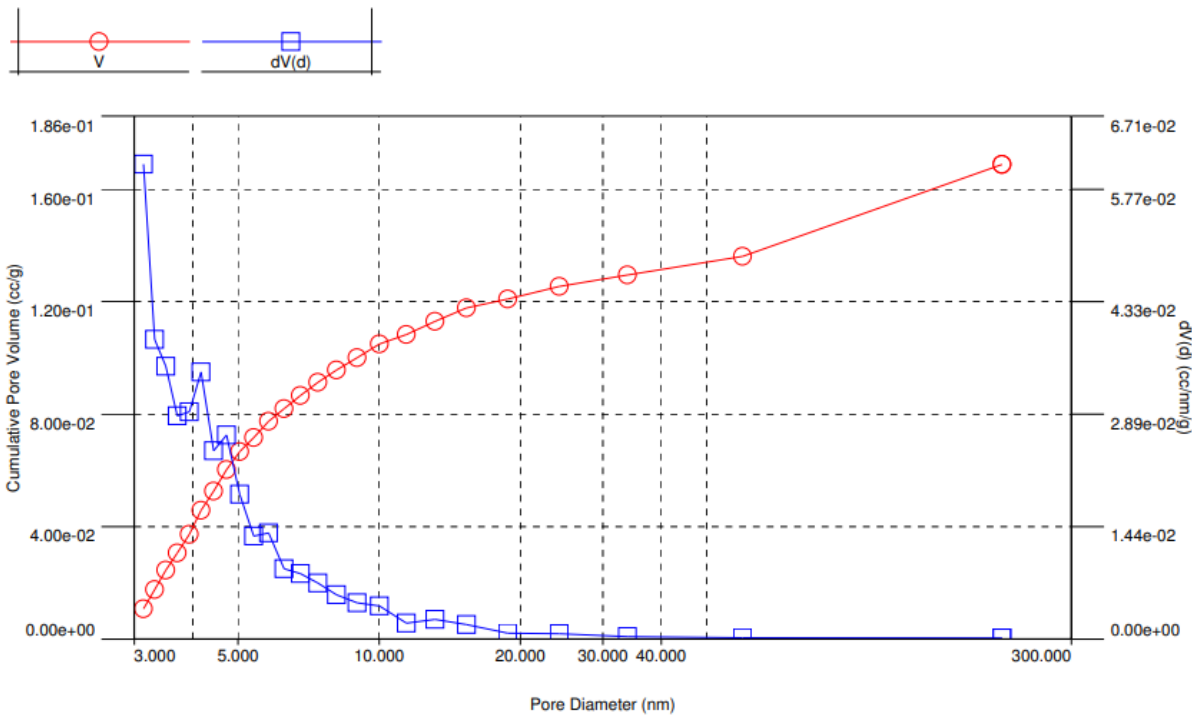

**HZ-Ta**

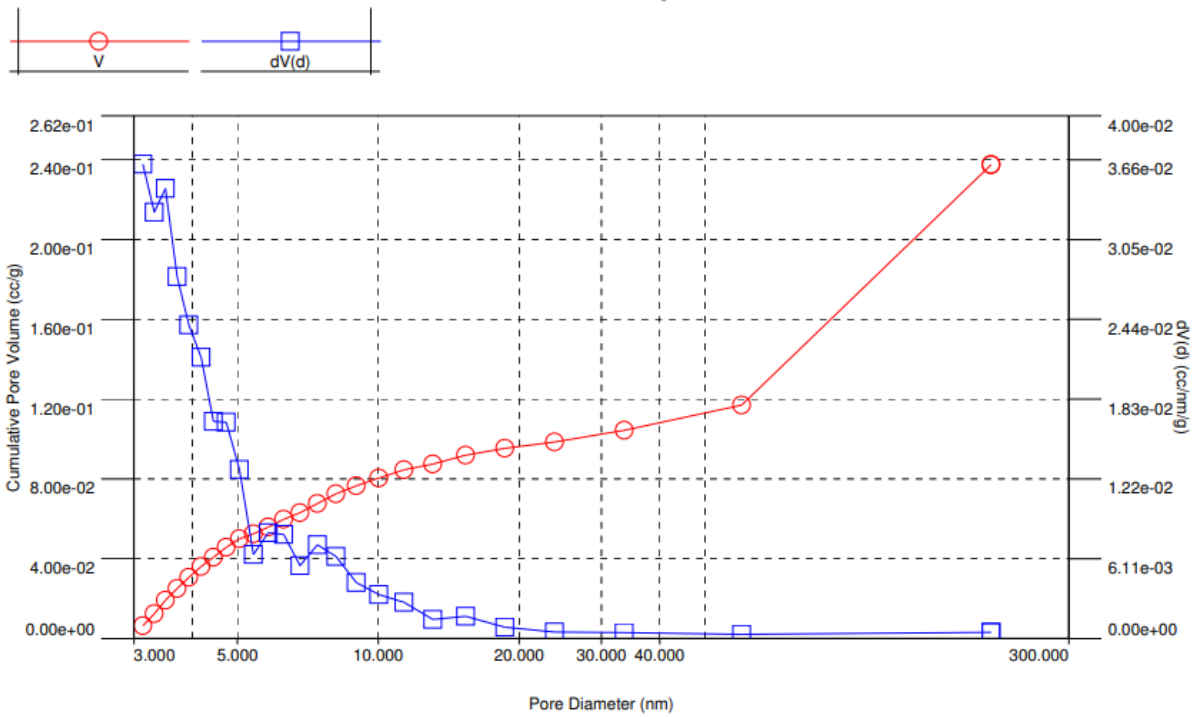

**HZ-V**

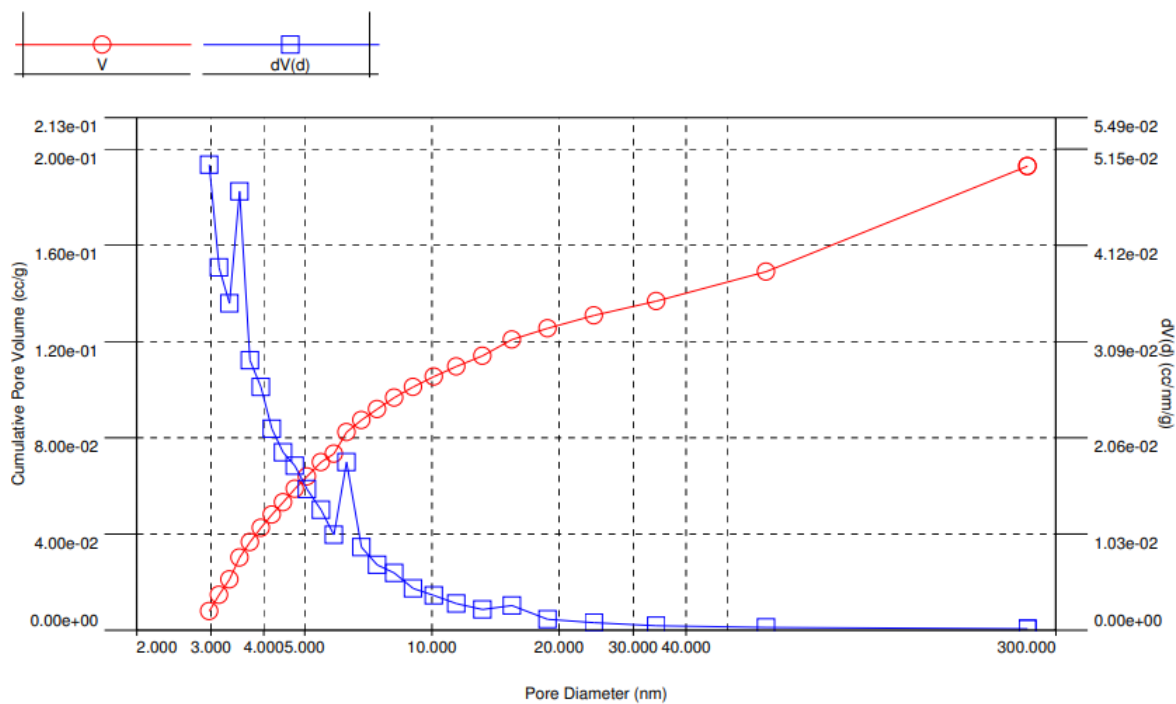

**Figure S1.** Pore size distribution of hierarchical materials.

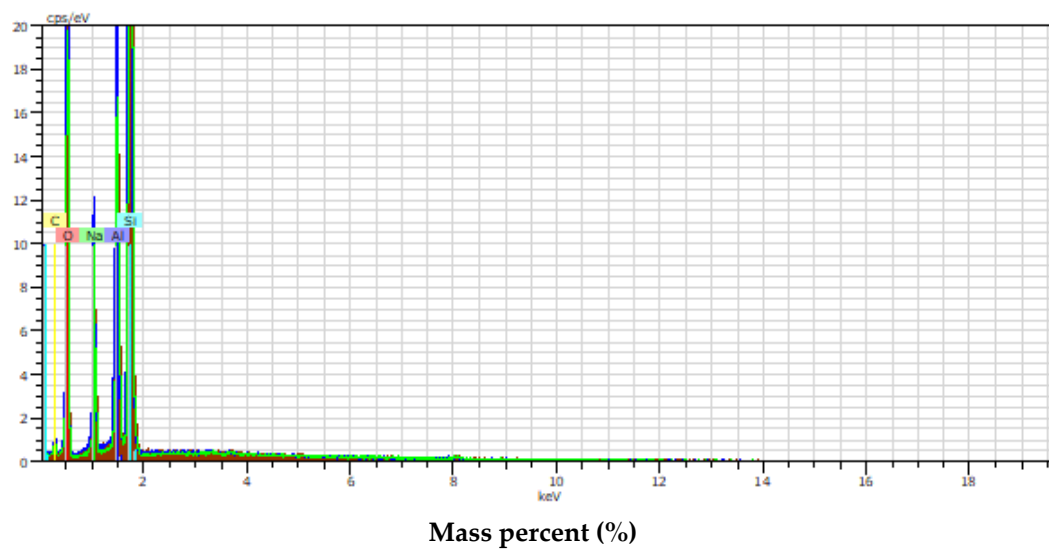

| Spectrum                   | C    | O     | Na   | Al    | Si    |
|----------------------------|------|-------|------|-------|-------|
| Mean value from 30 points: | 3.34 | 42.36 | 1.79 | 13.07 | 30.43 |

**Figure S2.** EDX profile for HZ-commercial.

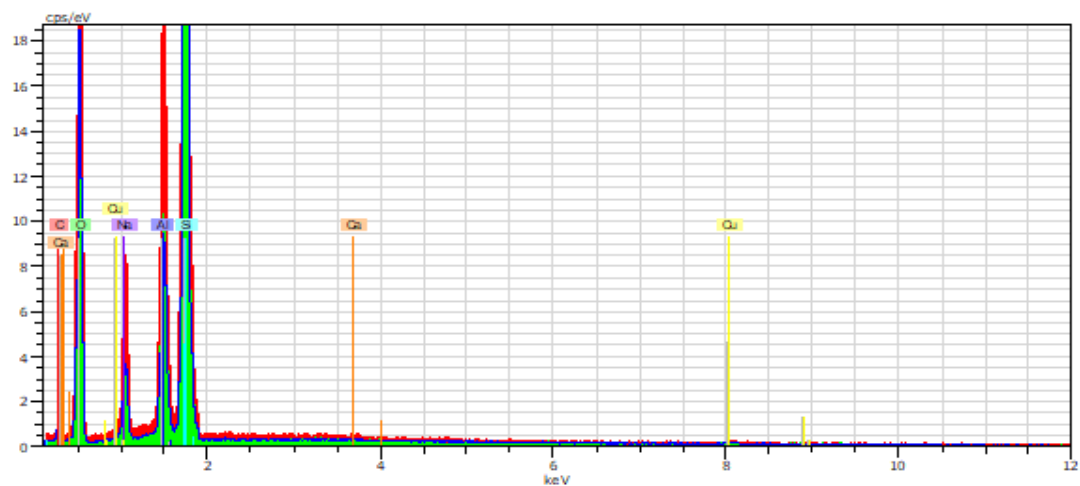

Mass percent (%)

| Spectrum                   | C    | O     | Na   | Al   | Si    | Ca*  | Cu*  |
|----------------------------|------|-------|------|------|-------|------|------|
| Mean value from 30 points: | 2.36 | 47.07 | 6.10 | 9.70 | 34.12 | 0.14 | 0.50 |

\* impurities

Figure S3. EDX profile for HZ.

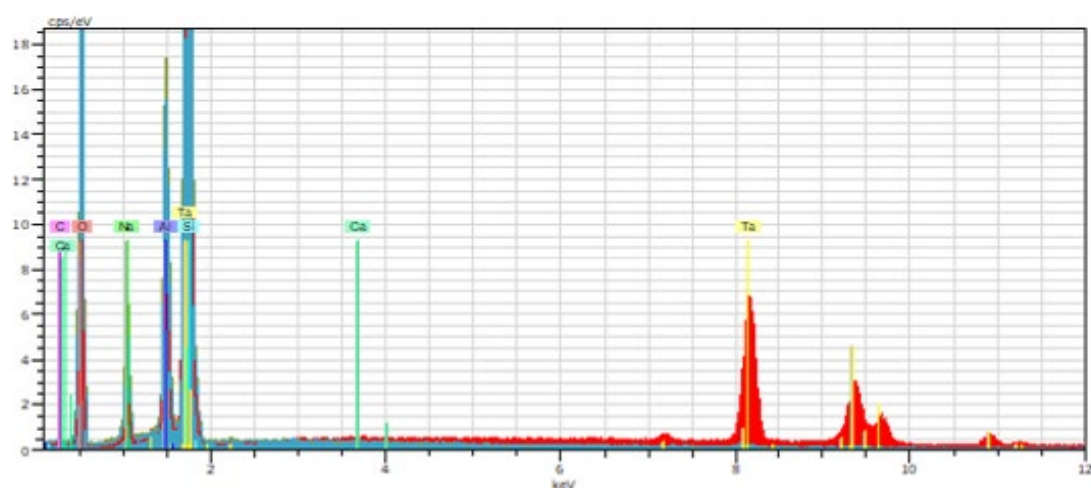

Mass percent (%)

| Spectrum                   | C    | O     | Na   | Al   | Si    | Ca*  | Ta   |
|----------------------------|------|-------|------|------|-------|------|------|
| Mean value from 30 points: | 2.34 | 38.64 | 5.16 | 8.69 | 32.68 | 0.14 | 1.63 |

\* impurities

Figure S4. EDX profile for HZ-Ta.

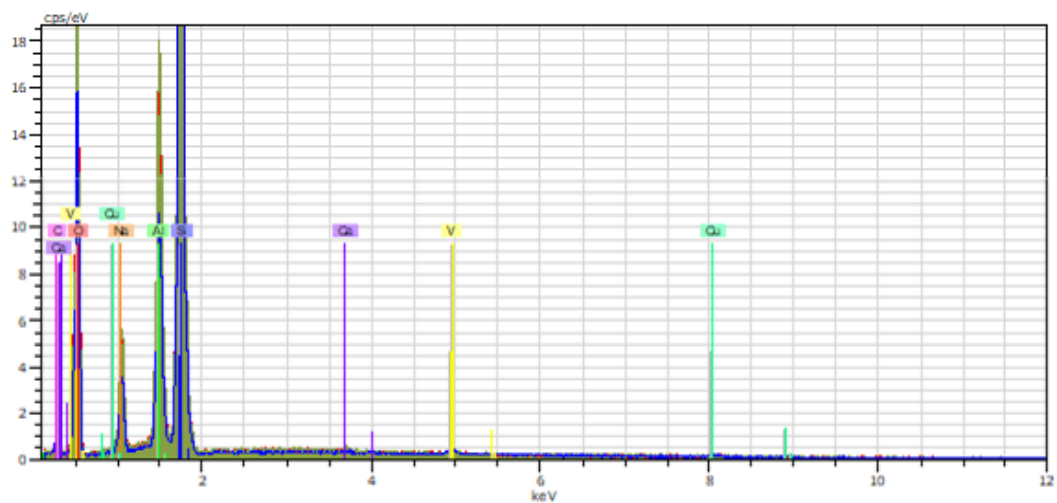

Mass percent (%)

| Spectrum                   | C    | O     | Na   | Al    | Si    | Ca*  | V    | Cu*  |
|----------------------------|------|-------|------|-------|-------|------|------|------|
| Mean value from 30 points: | 3.24 | 42.95 | 5.75 | 10.66 | 36.51 | 0.05 | 0.35 | 0.49 |

\* impurities

Figure S5. EDX profile for HZ-V.

Table S1. Chemical composition of zeolite Y (FAU)

|                                                             |            |
|-------------------------------------------------------------|------------|
| SiO <sub>2</sub>                                            | 57.94 wt.% |
| Al <sub>2</sub> O <sub>3</sub>                              | 19.03 wt.% |
| Na <sub>2</sub> O                                           | 1.95 wt.%  |
| SiO <sub>2</sub> /Al <sub>2</sub> O <sub>3</sub> mole ratio | 5.10       |
